# Supplementary material
Source: MDPI journal article supplement (https://www.mdpi.com/2073-4395/12/12/3203)
Supplement: s1 [file s1 › agronomy-2034267-supplementary.pdf]

Table S1. Repartition of studied coffee samples according to their geographical origin and genetic cluster detailing Ethiopian districts and Yemeni governorates.

|                                          |                  |                                       | Core Ethiopia |             | Domestication pathway |                |           |        |              |
|------------------------------------------|------------------|---------------------------------------|---------------|-------------|-----------------------|----------------|-----------|--------|--------------|
| List samples                             | High level areas | Zone (Ethiopia) / Governorate (Yemen) | Core Eth. 1   | Core Eth. 2 | Ethiopian Legacy      | Typica Bourbon | New-Yemen | Harrar | <i>Total</i> |
| Ethiopia COE                             | Southwest        | Awi/Agew                              | 1             |             |                       |                |           |        | 1            |
|                                          |                  | Bench Maji                            | 1             | 2           | 1                     |                |           |        | 4            |
|                                          |                  | Hadiya                                | 1             |             | 1                     |                |           |        | 2            |
|                                          |                  | Horo guduru                           | 1             |             |                       |                |           |        | 1            |
|                                          |                  | Ilubabor                              | 3             | 5           | 1                     |                |           |        | 9            |
|                                          |                  | Jimma                                 | 40            | 25          | 1                     |                |           |        | 66           |
|                                          |                  | Keffa                                 | 1             | 8           |                       |                |           |        | 9            |
|                                          |                  | Kelem Wellega                         | 3             | 1           |                       |                |           |        | 4            |
|                                          |                  | KT                                    |               |             | 1                     |                |           |        | 1            |
|                                          |                  | Majang                                | 1             |             |                       |                |           |        | 1            |
|                                          |                  | Sheka                                 | 3             | 2           |                       |                |           |        | 5            |
|                                          |                  | South Omo                             |               | 1           |                       |                |           |        | 1            |
|                                          |                  | West Shewa                            | 3             |             |                       |                |           |        | 3            |
|                                          |                  | West Wellega                          | 4             | 2           |                       |                |           |        | 6            |
|                                          |                  | South                                 | Borena        |             | 1                     |                |           |        |              |
|                                          | Gedio            |                                       | 14            | 27          | 8                     |                |           | 2      | 51           |
|                                          | Guji             |                                       | 6             | 40          | 6                     | 1              |           | 1      | 54           |
|                                          | Sidama           |                                       | 10            | 27          | 3                     |                |           | 1      | 41           |
|                                          | West Arsi        |                                       | 24            | 38          |                       |                | 1         | 2      | 65           |
|                                          | East / Hararghe  | Arsi                                  | 1             |             | 1                     |                |           |        | 2            |
|                                          |                  | East Harerge                          | 1             |             | 1                     |                | 1         | 17     | 20           |
|                                          |                  | West Harerge                          | 1             |             | 1                     |                | 1         | 6      | 9            |
| Yemen Survey                             |                  | Dhamar                                |               |             |                       | 23             | 8         |        | 31           |
|                                          |                  | Ibb                                   |               |             | 24                    | 15             | 4         | 1      | 44           |
|                                          |                  | Mahwit                                |               |             |                       |                | 25        |        | 25           |
|                                          |                  | Sadaa                                 |               |             |                       | 3              |           |        | 3            |
|                                          |                  | Sanaa                                 |               |             | 5                     | 9              | 69        |        | 83           |
| Varieties cultivated worldwide           |                  |                                       |               |             | 5                     | 4              |           |        | 9            |
| Ethiopian landraces cultivated worldwide |                  |                                       |               |             |                       |                |           |        | 4            |
| <i>Total</i>                             |                  |                                       | 123           | 179         | 59                    | 55             | 109       | 30     | 555          |

Table S2 : Percentage of samples bearing most discriminating SSR alleles in each identified *C. arabica* genetic clusters (all samples).

| Marker | Ssr     | Core Ethiopia |             | Domestication pathway |                |           |        |
|--------|---------|---------------|-------------|-----------------------|----------------|-----------|--------|
|        |         | Core Eth. 1   | Core Eth. 2 | Ethiopian Legacy      | Typica Bourbon | New-Yemen | Harrar |
| 29     | 29_133  | 8%            | 3%          | 82%                   | 99%            | 100%      | 92%    |
|        | 29_135  | 96%           | 99%         | 21%                   | 1%             | 0%        | 4%     |
| 225    | 225_265 | 18%           | 7%          | 35%                   | 35%            | 50%       | 100%   |
|        | 225_269 | 93%           | 96%         | 69%                   | 69%            | 51%       | 0%     |
|        | 225_296 | 89%           | 96%         | 6%                    | 0%             | 0%        | 0%     |
|        | 225_298 | 10%           | 5%          | 84%                   | 100%           | 1%        | 4%     |
|        | 225_302 | 3%            | 3%          | 14%                   | 3%             | 100%      | 96%    |
| 24     | 24_153  | 22%           | 11%         | 23%                   | 4%             | 44%       | 72%    |
|        | 24_160  | 1%            | 1%          | 26%                   | 0%             | 0%        | 0%     |
|        | 24_161  | 2%            | 1%          | 10%                   | 23%            | 19%       | 4%     |
|        | 24_163  | 17%           | 8%          | 57%                   | 79%            | 77%       | 100%   |
|        | 24_165  | 5%            | 77%         | 1%                    | 0%             | 0%        | 0%     |
|        | 24_174  | 36%           | 7%          | 3%                    | 0%             | 0%        | 0%     |
| 32     | 32_129  | 4%            | 2%          | 34%                   | 56%            | 96%       | 0%     |
|        | 32_133  | 72%           | 95%         | 74%                   | 42%            | 3%        | 96%    |
| 47     | 47_116  | 0%            | 0%          | 1%                    | 0%             | 0%        | 60%    |
|        | 47_117  | 100%          | 100%        | 99%                   | 99%            | 100%      | 40%    |
|        | 47_137  | 31%           | 94%         | 1%                    | 0%             | 0%        | 0%     |
|        | 47_150  | 64%           | 11%         | 92%                   | 99%            | 99%       | 96%    |
| 235    | 235_251 | 47%           | 95%         | 35%                   | 10%            | 35%       | 96%    |
|        | 235_257 | 5%            | 3%          | 65%                   | 92%            | 68%       | 4%     |
|        | 235_265 | 35%           | 6%          | 0%                    | 0%             | 0%        | 0%     |
| 244    | 244_302 | 96%           | 15%         | 39%                   | 1%             | 0%        | 88%    |
|        | 244_306 | 10%           | 97%         | 61%                   | 89%            | 99%       | 12%    |
| 254    | 254_200 | 0%            | 0%          | 0%                    | 0%             | 0%        | 0%     |
|        | 254_202 | 4%            | 1%          | 5%                    | 100%           | 72%       | 20%    |
|        | 254_218 | 94%           | 100%        | 96%                   | 0%             | 32%       | 84%    |

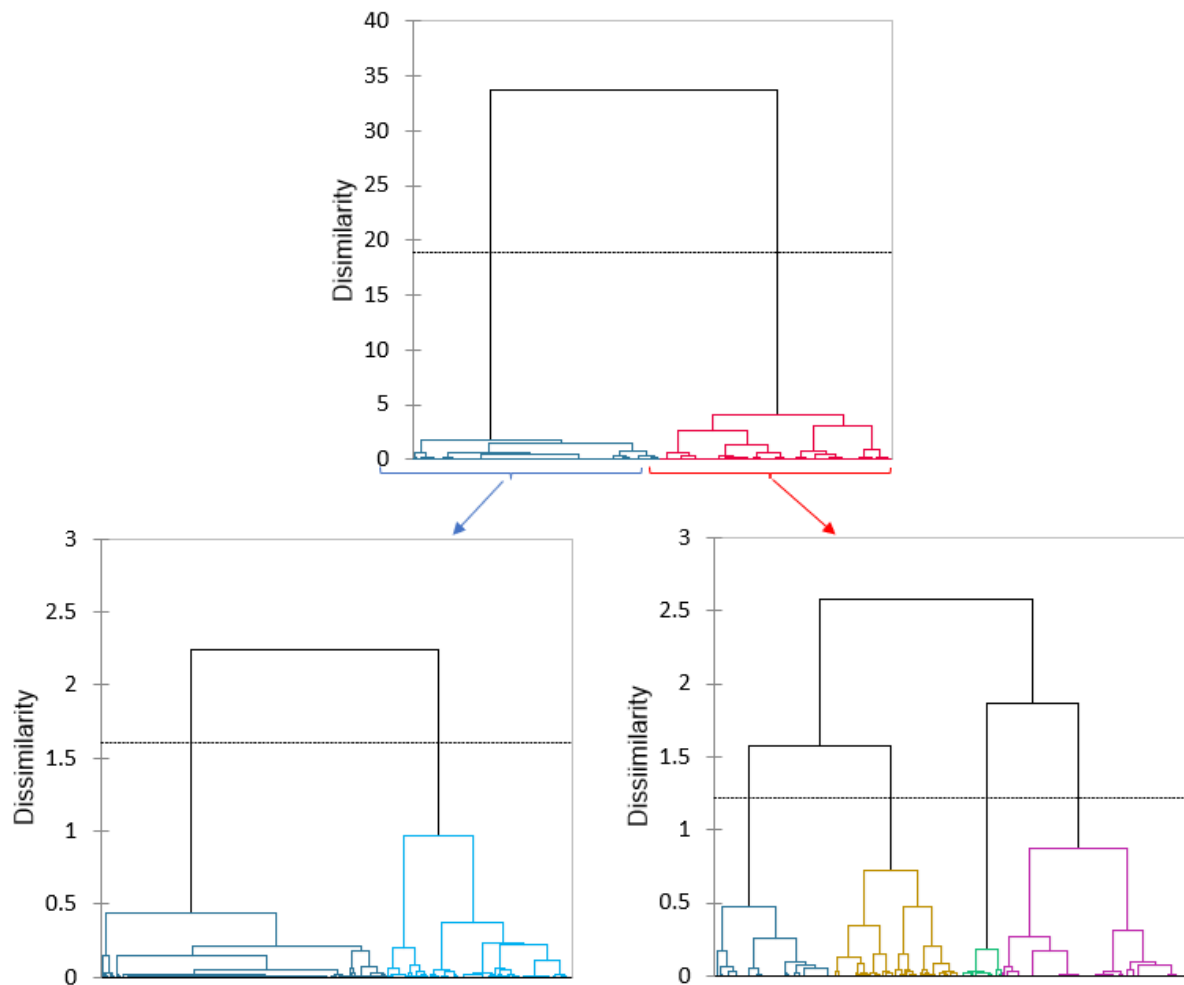

Figure S1. Cluster analysis based on the five first components of the PCoA based on the Dice Index dissimilarity matrix of all the coffee samples of the study (up) and then for each main cluster separately (Bottom).

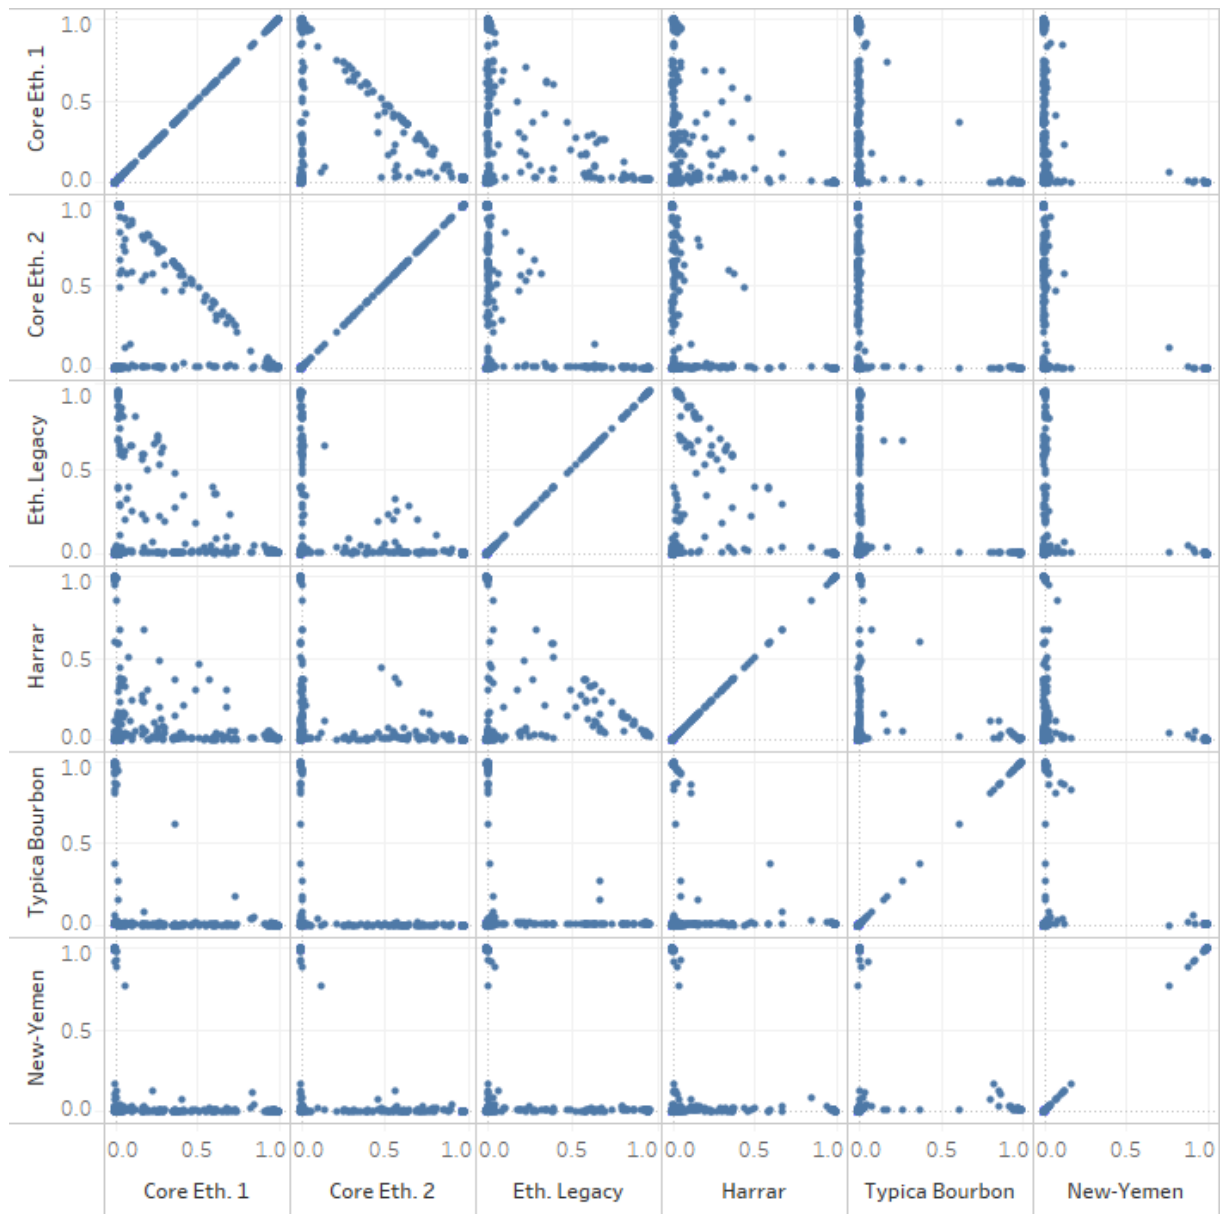

Figure S2. Plots of ancestry coefficients of each pair of the 6 clusters after Admixture model. Each point represents a sample. Samples with intermediate values between 0 and 1, hence not on the vertical or horizontal axis, are admixed.
